# Supplementary material for: Higher dose versus lower dose of antiviral therapy in the treatment of herpes zoster infection in the elderly: a matched retrospective population-based cohort study
Source: PubMed Central journal article supplement (PMC4158397; doi:10.1186/2050-6511-15-48), 2014-09-04

**Supplementary Table 1. STROBE checklist**

| <b>STROBE checklist</b>   |                |                                                                                                                                 |                           |
|---------------------------|----------------|---------------------------------------------------------------------------------------------------------------------------------|---------------------------|
|                           | <b>Item No</b> | <b>Recommendation</b>                                                                                                           | <b>Reported on Page #</b> |
| <b>Title and abstract</b> | 1              | (a) Indicate the study's design with a commonly used term in the title or the abstract                                          | Abstract                  |
|                           |                | (b) Provide in the abstract an informative and balanced summary of what was done and what was found                             | Abstract                  |
| <b>Introduction</b>       |                |                                                                                                                                 |                           |
| Background/rationale      | 2              | Explain the scientific background and rationale for the investigation being reported                                            | Introduction              |
| Objectives                | 3              | State specific objectives, including any prespecified hypotheses                                                                | Introduction              |
| <b>Methods</b>            |                |                                                                                                                                 |                           |
| Study design              | 4              | Present key elements of study design early in the paper                                                                         | Methods                   |
| Setting                   | 5              | Describe the setting, locations, and relevant dates, including periods of recruitment, exposure, follow-up, and data collection | Methods                   |
| Participants              | 6              | (a) Give the eligibility criteria, and the sources and methods of selection of participants. Describe methods of follow-up      | Methods                   |
|                           |                | (b) For matched studies, give matching criteria and                                                                             | Methods                   |

|                              |    |                                                                                                                                                                                      |                                     |
|------------------------------|----|--------------------------------------------------------------------------------------------------------------------------------------------------------------------------------------|-------------------------------------|
|                              |    | number of exposed and unexposed                                                                                                                                                      |                                     |
| Variables                    | 7  | Clearly define all outcomes, exposures, predictors, potential confounders, and effect modifiers. Give diagnostic criteria, if applicable                                             | Methods<br>Supplementary<br>Table 2 |
| Data sources/<br>measurement | 8  | For each variable of interest, give sources of data and details of methods of assessment (measurement). Describe comparability of assessment methods if there is more than one group | Methods                             |
| Bias                         | 9  | Describe any efforts to address potential sources of bias                                                                                                                            | Discussion                          |
| Study size                   | 10 | Explain how the study size was arrived at                                                                                                                                            | Methods                             |
| Quantitative variables       | 11 | Explain how quantitative variables were handled in the analyses. If applicable, describe which groupings were chosen and why                                                         | Methods                             |
| Statistical methods          | 12 | (a) Describe all statistical methods, including those used to control for confounding                                                                                                | Methods                             |
|                              |    | (b) Describe any methods used to examine subgroups and interactions                                                                                                                  | Methods                             |
|                              |    | (c) Explain how missing data were addressed                                                                                                                                          | Methods                             |
|                              |    | (d) If applicable, explain how loss to follow-up was addressed                                                                                                                       | Not<br>Applicable                   |
|                              |    | (e) Describe any sensitivity analyses                                                                                                                                                | Methods<br>Results                  |
| <b>Results</b>               |    |                                                                                                                                                                                      |                                     |

|                  |    |                                                                                                                                                                                                               |                        |
|------------------|----|---------------------------------------------------------------------------------------------------------------------------------------------------------------------------------------------------------------|------------------------|
| Participants     | 13 | (a) Report numbers of individuals at each stage of study—e.g. numbers potentially eligible, examined for eligibility, confirmed eligible, included in the study, completing follow-up, and analysed           | Supplementary Figure 1 |
|                  |    | (b) Give reasons for non-participation at each stage                                                                                                                                                          | Supplementary Figure 1 |
|                  |    | (c) Consider use of a flow diagram                                                                                                                                                                            | Supplementary Figure 1 |
| Descriptive data | 14 | (a) Give characteristics of study participants (e.g. demographic, clinical, social) and information on exposures and potential confounders                                                                    | Table 2                |
|                  |    | (b) Indicate number of participants with missing data for each variable of interest                                                                                                                           | Table 2                |
|                  |    | (c) Summarise follow-up time (e.g. average and total amount)                                                                                                                                                  | Results                |
| Outcome data     | 15 | Report numbers of outcome events or summary measures over time                                                                                                                                                | Table 3                |
| Main results     | 16 | (a) Give unadjusted estimates and, if applicable, confounder-adjusted estimates and their precision (e.g. 95% confidence interval). Make clear which confounders were adjusted for and why they were included | Table 3                |
|                  |    | (b) Report category boundaries when continuous variables were categorized                                                                                                                                     | Table 2                |
|                  |    | (c) If relevant, consider translating estimates of                                                                                                                                                            | Not                    |

|                          |    |                                                                                                                                                                            |                     |
|--------------------------|----|----------------------------------------------------------------------------------------------------------------------------------------------------------------------------|---------------------|
|                          |    | relative risk into absolute risk for a meaningful time period                                                                                                              | Applicable          |
| Other analyses           | 17 | Report other analyses done—e.g. analyses of subgroups and interactions, and sensitivity analyses                                                                           | Results<br>Figure 1 |
| <b>Discussion</b>        |    |                                                                                                                                                                            |                     |
| Key results              | 18 | Summarise key results with reference to study objectives                                                                                                                   | Discussion          |
| Limitations              | 19 | Discuss limitations of the study, taking into account sources of potential bias or imprecision. Discuss both direction and magnitude of any potential bias                 | Discussion          |
| Interpretation           | 20 | Give a cautious overall interpretation of results considering objectives, limitations, multiplicity of analyses, results from similar studies, and other relevant evidence | Discussion          |
| Generalisability         | 21 | Discuss the generalisability (external validity) of the study results                                                                                                      | Discussion          |
| <b>Other information</b> |    |                                                                                                                                                                            |                     |
| Funding                  | 22 | Give the source of funding and the role of the funders for the present study and, if applicable, for the original study on which the present article is based              | Disclosure          |

**Supplementary Table 2. Databases and coding definitions for baseline characteristics and study outcomes**

| Characteristic/Condition              | Database | Codes                                                                                                                                                                                                                                                                                         |
|---------------------------------------|----------|-----------------------------------------------------------------------------------------------------------------------------------------------------------------------------------------------------------------------------------------------------------------------------------------------|
| Age, Sex, Income, Rural               | RPDB     |                                                                                                                                                                                                                                                                                               |
| Year of Cohort Entry                  | ODB      |                                                                                                                                                                                                                                                                                               |
| Prescribing Physician                 | IPDB     |                                                                                                                                                                                                                                                                                               |
| Modified Charlson Score               | CIHI-DAD |                                                                                                                                                                                                                                                                                               |
| Chronic Kidney Disease                | CIHI-DAD | ICD-9: 250.40, 403.0, 403.1, 403.9, 404.0, 404.1, 404.9, 585, 586, 588.8, 588.9<br>ICD-10: E10.2, E11.2, E13.2, E14.2, I12, I13, N08, N18, N19                                                                                                                                                |
|                                       | OHIP     | OHIP: 403, 585                                                                                                                                                                                                                                                                                |
| Chronic Liver Disease                 | CIHI-DAD | ICD-9: 070, 275.0, 275.1, 456.1, 456.2, 571, 572.2, 572.3, 572.4, 572.8, 573, 782.4, 789.1, 789.5, V026<br>ICD-10: B16, B17, B18, B19, B94.2, E83.0, E83.1, I85, K70, K71.3, K71.4, K71.5, K71.7, K72.1, K72.9, K73, K74, K75.3, K75.4, K75.8, K75.9, K76, K77, R16.0, R16.2, R17, R18, Z22.5 |
|                                       | OHIP     | OHIP: 070, 571, 573, Z551, Z554                                                                                                                                                                                                                                                               |
| Chronic Obstructive Pulmonary Disease | CIHI-DAD | ICD-9: 491, 492, 496<br>ICD10: J41, J43, J44                                                                                                                                                                                                                                                  |
| Coronary Artery Disease               | CIHI-DAD | ICD-9: 410, 412, 413, 414, 429.2, 429.5, 429.6, 429.7<br>ICD-10: I20, I21, I22, I23, I24, I25, R93.1, T82.2, Z95.5, Z95.8, Z95.9<br>CCI: 1.IJ.26, 1.IJ.27, 1.IJ.50 1.IJ.54, 1.IJ.57, 1.IJ.76<br>CCP: 48.01, 48.02, 48.03, 48.04, 48.05, 48.1, 48.2, 48.3                                      |
|                                       | OHIP     | OHIP: E646, E651, E652, E654, E655, G262, G298, R741, R742,                                                                                                                                                                                                                                   |

|                                   |                  |                                                                                                                                                                                 |
|-----------------------------------|------------------|---------------------------------------------------------------------------------------------------------------------------------------------------------------------------------|
|                                   |                  | R743, Z434, Z448, 410, 412, 413                                                                                                                                                 |
| Diabetes mellitus                 | ODB <sup>a</sup> |                                                                                                                                                                                 |
| Heart Failure                     | CIHI-DAD         | ICD-9: 425, 428, 514, 518.4<br>ICD-10: I25.5, I50.0, I50.1, I50.9, J81<br>CCI: 1.HP.53, 1.HP.55, 1.HZ.53.GRFR, 1.HZ.53.LAFR,<br>1.HZ.53.SYFR<br>CCP: 49.61, 49.62, 49.63, 49.64 |
|                                   | OHIP             | OHIP: R701, R702, Z429, 428                                                                                                                                                     |
| Stroke/TIA                        | CIHI-DAD         | ICD-9: 431, 434, 435.8, 435.9, 436<br>ICD-10: G45, H34.1, I61, I62.9, I63.0, I63.1, I63.2, I63.3, I63.4,<br>I63.5, I63.8, I63.9, I64                                            |
| Herpes zoster<br>(nervous system) | CIHI-DAD         | ICD-9: 053.1<br>ICD-10: B02.2                                                                                                                                                   |
| Herpes zoster (eye)               | CIHI-DAD         | ICD-9: 053.2<br>ICD-10: B02.3                                                                                                                                                   |
| Herpes zoster (other)             | CIHI-DAD         | ICD-9: 053.7, 053.8, 053.9<br>ICD-10: B02.7, B02.8, B02.9                                                                                                                       |
|                                   | OHIP             | OHIP: 053                                                                                                                                                                       |
| CT scan of the head               | CIHI-DAD         | CCI: 3AN20, 3EA20, 3ER20                                                                                                                                                        |
|                                   | OHIP             | OHIP: X188, X400, X401, X402, X405, X408                                                                                                                                        |
| Mortality                         | RPDB             | Vital status field                                                                                                                                                              |

<sup>a</sup> Patients with diabetes were identified through the use of prescription oral hypoglycemic agents or insulin

*Abbreviations:* CCI, Canadian Classification of Health Interventions; CCP, Canadian Classification of Diagnostic, Therapeutic and Surgical Procedures; CIHI-DAD, Canadian Institute for Health Information

hospital Discharge Abstract Database; CT, Computed Tomography; ICD-9 International Classification of Disease, Ninth Revision; ICD-10, International Classification of Disease, Tenth Revision; IPDB, ICES (Institute for Clinical Evaluative Sciences) Physician Database; ODB, Ontario Drug Benefit; OHIP, Ontario Health Insurance Plan; RPDB, Registered Persons Database of Ontario; TIA, Transient Ischemic Attack.

## Supplementary Figure 1. Cohort selection

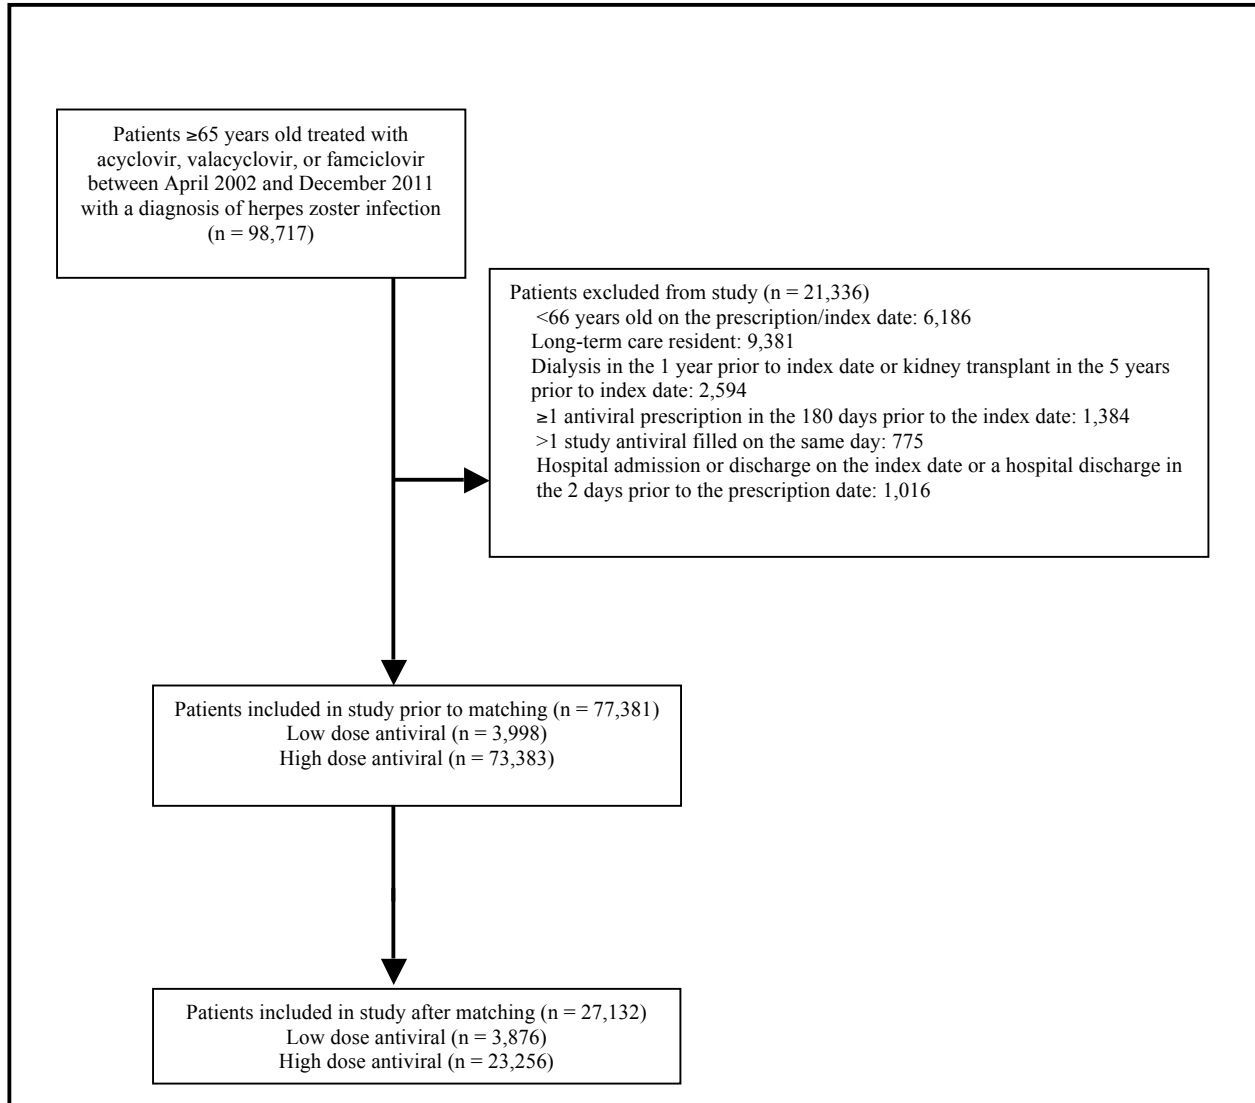

Supplement: 2050-6511-15-48-S1.pdf [file 2050-6511-15-48-S1.pdf]
